# Supplementary material for: Genome-Wide Identification of 2-Oxoglutarate and Fe (II)-Dependent Dioxygenase (2ODD-C) Family Genes and Expression Profiles under Different Abiotic Stresses in Camellia sinensis (L.)
Source: MDPI journal article supplement (doi:10.3390/plants12061302), 2023-03-14
Supplement: s1 [file s1]

**Table S7** The same expression pattern of CsODD-C genes under PEG and NaCl treatments.

| Type   | Genes      | PEG    |        |        | NaCL   |        |        |
|--------|------------|--------|--------|--------|--------|--------|--------|
|        |            | 0 h    | 24 h   | 48 h   | 0 h    | 24 h   | 48 h   |
| Type 1 | CsODD-C117 | 33.56  | 502.78 | 153.27 | 33.56  | 112.36 | 194.06 |
|        | CsODD-C140 | 1.13   | 5.86   | 5.06   | 1.13   | 6.13   | 7.78   |
|        | CsODD-C35  | 0.00   | 0.37   | 0.59   | 0.00   | 0.55   | 0.25   |
|        | CsODD-C36  | 12.98  | 116.03 | 58.71  | 12.98  | 93.77  | 66.43  |
|        | CsODD-C39  | 0.70   | 12.05  | 10.54  | 0.70   | 11.85  | 7.46   |
|        | CsODD-C44  | 2.79   | 33.43  | 32.18  | 2.79   | 70.32  | 56.16  |
|        | CsODD-C121 | 16.24  | 61.81  | 40.93  | 16.24  | 62.41  | 77.53  |
| Type 2 | CsODD-C6   | 2.61   | 17.10  | 71.73  | 2.61   | 29.22  | 16.69  |
|        | CsODD-C48  | 3.41   | 4.55   | 0.95   | 3.41   | 11.05  | 2.37   |
|        | CsODD-C110 | 0.00   | 0.33   | 0.00   | 0.00   | 0.30   | 0.00   |
| Type 3 | -          | -      | -      | -      | -      | -      | -      |
| Type 4 | CsODD-C101 | 11.03  | 2.04   | 1.85   | 11.03  | 2.66   | 3.20   |
|        | CsODD-C109 | 0.16   | 0.00   | 0.00   | 0.16   | 0.00   | 0.00   |
|        | CsODD-C111 | 13.05  | 4.58   | 7.10   | 13.05  | 7.90   | 7.53   |
|        | CsODD-C118 | 13.72  | 2.40   | 5.18   | 13.72  | 1.28   | 1.15   |
|        | CsODD-C123 | 12.51  | 5.67   | 8.76   | 12.51  | 6.03   | 7.98   |
|        | CsODD-C126 | 13.05  | 4.58   | 7.10   | 13.05  | 7.90   | 7.53   |
|        | CsODD-C132 | 106.23 | 23.13  | 26.52  | 106.23 | 43.79  | 32.89  |
|        | CsODD-C135 | 13.05  | 4.58   | 7.10   | 13.05  | 7.90   | 7.53   |
|        | CsODD-C138 | 12.51  | 5.67   | 8.76   | 12.51  | 6.03   | 7.98   |
|        | CsODD-C141 | 266.94 | 26.22  | 72.38  | 266.94 | 116.76 | 191.04 |
|        | CsODD-C142 | 13.05  | 4.58   | 7.10   | 13.05  | 7.90   | 7.53   |
|        | CsODD-C143 | 7.52   | 4.29   | 5.18   | 7.52   | 7.15   | 7.33   |
|        | CsODD-C144 | 0.06   | 0.00   | 0.00   | 0.06   | 0.00   | 0.00   |
|        | CsODD-C148 | 0.06   | 0.00   | 0.00   | 0.06   | 0.00   | 0.00   |
|        | CsODD-C152 | 106.23 | 23.13  | 26.52  | 106.23 | 43.79  | 32.89  |
|        | CsODD-C20  | 0.60   | 0.21   | 0.26   | 0.60   | 0.13   | 0.36   |
|        | CsODD-C21  | 418.27 | 163.19 | 100.93 | 418.27 | 110.97 | 180.80 |
|        | CsODD-C23  | 0.34   | 0.00   | 0.00   | 0.34   | 0.00   | 0.00   |
|        | CsODD-C24  | 1.34   | 0.28   | 0.00   | 1.34   | 0.33   | 0.00   |
|        | CsODD-C25  | 0.34   | 0.00   | 0.00   | 0.33   | 0.00   | 0.00   |
|        | CsODD-C28  | 180.45 | 97.47  | 72.13  | 180.45 | 51.62  | 117.69 |
|        | CsODD-C45  | 1.71   | 0.00   | 0.39   | 1.71   | 0.00   | 0.00   |
|        | CsODD-C55  | 1.69   | 0.43   | 0.17   | 1.69   | 0.88   | 1.01   |
|        | CsODD-C57  | 269.95 | 36.77  | 73.44  | 269.95 | 30.66  | 38.95  |
|        | CsODD-C59  | 14.81  | 4.14   | 5.09   | 14.81  | 6.71   | 8.98   |
|        | CsODD-C65  | 0.10   | 0.00   | 0.00   | 0.10   | 0.00   | 0.00   |
|        | CsODD-C71  | 290.98 | 62.98  | 103.34 | 290.98 | 49.35  | 72.85  |

|           |        |       |        |        |       |       |
|-----------|--------|-------|--------|--------|-------|-------|
| CsODD-C73 | 7.50   | 1.32  | 3.37   | 7.50   | 3.65  | 3.93  |
| CsODD-C75 | 8.84   | 0.90  | 0.72   | 8.84   | 2.21  | 3.50  |
| CsODD-C81 | 41.47  | 5.45  | 4.55   | 41.47  | 19.52 | 12.08 |
| CsODD-C84 | 290.98 | 62.98 | 103.34 | 290.98 | 49.35 | 72.85 |
| CsODD-C85 | 290.98 | 62.98 | 103.34 | 290.98 | 49.35 | 72.85 |
| CsODD-C87 | 2.22   | 0.26  | 0.53   | 2.22   | 0.31  | 0.36  |
| CsODD-C88 | 2.22   | 0.26  | 0.53   | 2.22   | 0.31  | 0.36  |
| CsODD-C90 | 13.72  | 2.40  | 5.18   | 13.72  | 1.28  | 1.15  |
| CsODD-C91 | 1.12   | 0.70  | 0.37   | 1.12   | 0.35  | 0.72  |
| CsODD-C94 | 1.82   | 0.00  | 0.00   | 1.82   | 0.45  | 0.32  |
| CsODD-C98 | 13.05  | 4.58  | 7.10   | 13.05  | 7.90  | 7.53  |

---
