# Supplementary material for: Genome-Wide Identification of 2-Oxoglutarate and Fe (II)-Dependent Dioxygenase (2ODD-C) Family Genes and Expression Profiles under Different Abiotic Stresses in Camellia sinensis (L.)
Source: MDPI journal article supplement (doi:10.3390/plants12061302), 2023-03-14
Supplement: s1 [file s1]

**Table S6** The same expression pattern of *CsODD-C* genes under MeJA and NaCl treatments

| Type   | Genes      | MeJA   |       |        | NaCL  |        |        |
|--------|------------|--------|-------|--------|-------|--------|--------|
|        |            | 0 h    | 24 h  | 48 h   | 0 h   | 24 h   | 48 h   |
| Type 1 | CsODD-C27  | 0.05   | 0.99  | 0.66   | 16.54 | 109.44 | 79.96  |
|        | CsODD-C36  | 1.09   | 4.85  | 3.08   | 12.98 | 116.03 | 58.71  |
|        | CsODD-C4   | 0.00   | 0.03  | 0.00   | 0.00  | 0.20   | 0.08   |
| Type 2 | CsODD-C30  | 4.97   | 10.08 | 3.27   | 90.27 | 11.59  | 40.79  |
|        | CsODD-C72  | 0.21   | 0.28  | 0.05   | 2.61  | 7.26   | 4.71   |
|        | CsODD-C95  | 0.21   | 0.28  | 0.05   | 2.61  | 7.26   | 4.71   |
|        | CsODD-C52  | 4.40   | 4.24  | 5.13   | 3.13  | 1.82   | 2.64   |
| Type 3 | CsODD-C67  | 129.25 | 69.23 | 249.34 | 73.46 | 93.62  | 70.15  |
|        | CsODD-C116 | 40.78  | 40.19 | 99.73  | 33.56 | 502.78 | 153.27 |
|        | CsODD-C117 | 40.78  | 40.19 | 99.73  | 33.56 | 502.78 | 153.27 |

Note: Type1, the expression level of *CsODD-C* genes were increased after MeJA and PEG treatments; type2, the expression level of *CsODD-C* genes were increased from 0 h to 24h and then decreased from 24 h to 48 h after MeJA and PEG treatments; type3, *CsODD-C* genes were only upregulated in 48 h after MeJA and PEG treatments.
