# Supplementary material for: Genome-Wide Identification of 2-Oxoglutarate and Fe (II)-Dependent Dioxygenase (2ODD-C) Family Genes and Expression Profiles under Different Abiotic Stresses in Camellia sinensis (L.)
Source: MDPI journal article supplement (doi:10.3390/plants12061302), 2023-03-14
Supplement: s1 [file s1]

**Table S1** The detail information of CsODD genes in *C. sinensis*

| ID        | Gene         | Chr        | Intron | Predicted<br>Locaion | Chromosome position |           | Protein properties |      |             |
|-----------|--------------|------------|--------|----------------------|---------------------|-----------|--------------------|------|-------------|
|           |              |            |        |                      | Start               | End       | Length<br>(aa)     | PI   | Mw<br>(Kda) |
| Csodd-C1  | CSS0018726.1 | Contig1264 | 2      | Cytoplasm            | 110608              | 116401    | 343                | 8.01 | 38.22       |
| Csodd-C2  | CSS0030708.1 | Chr 11     | 2      | Cytoplasm            | 3975710             | 3981383   | 335                | 7.69 | 37.49       |
| Csodd-C3  | CSS0021896.1 | Chr 5      | 2      | Cytoplasm            | 192622146           | 192629165 | 344                | 5.81 | 38.72       |
| Csodd-C4  | CSS0029172.1 | Chr 8      | 2      | Cytoplasm            | 3305454             | 103307027 | 334                | 5.43 | 37.56       |
| Csodd-C5  | CSS0001566.1 | Chr 9      | 2      | Cytoplasm            | 3029515             | 3035878   | 362                | 6.27 | 40.44       |
| Csodd-C6  | CSS0000335.1 | Chr 7      | 2      | Cytoplasm            | 34743523            | 34746076  | 333                | 6.16 | 37.19       |
| Csodd-C7  | CSS0002801.1 | Chr 7      | 2      | Cytoplasm            | 34543734            | 34546926  | 333                | 6.16 | 37.19       |
| Csodd-C8  | CSS0010875.1 | Chr 5      | 2      | Cytoplasm            | 33956802            | 33959389  | 332                | 7.88 | 37.32       |
| Csodd-C9  | CSS0034370.1 | Chr 1      | 4      | Cytoplasm            | 148502510           | 148502737 | 338                | 5.97 | 38.73       |
| Csodd-C10 | CSS0032224.1 | Chr 1      | 3      | Cytoplasm            | 111864885           | 111885954 | 338                | 5.97 | 38.73       |
| Csodd-C11 | CSS0044637.1 | Chr 7      | 3      | Cytoplasm            | 183482816           | 183514115 | 337                | 5.27 | 38.72       |
| Csodd-C12 | CSS0003495.1 | Chr 12     | 3      | Cytoplasm            | 134186879           | 134191842 | 356                | 5.14 | 40.32       |
| Csodd-C13 | CSS0042033.1 | Chr 7      | 3      | Cytoplasm            | 183414418           | 183437718 | 337                | 5.44 | 38.72       |
| Csodd-C14 | CSS0007535.1 | Chr 9      | 3      | Cytoplasm            | 10504217            | 10507942  | 365                | 8.2  | 40.06       |
| Csodd-C15 | CSS0014892.1 | Chr 9      | 3      | Cytoplasm            | 9294053             | 9297535   | 365                | 8.2  | 40.11       |
| Csodd-C16 | CSS0033075.1 | Chr 4      | 2      | Cytoplasm            | 67261223            | 67266397  | 331                | 5.79 | 37.56       |
| Csodd-C17 | CSS0046529.1 | Contig1134 | 2      | Cytoplasm            | 738397              | 744362    | 331                | 5.43 | 37.59       |
| Csodd-C18 | CSS0021865.2 | Chr 4      | 2      | Cytoplasm            | 166079410           | 166089721 | 341                | 6.74 | 39.46       |
| Csodd-C19 | CSS0011972.1 | Chr 2      | 1      | Cytoplasm            | 116058917           | 116060956 | 373                | 8.25 | 41.08       |
| Csodd-C20 | CSS0047148.1 | Chr 2      | 1      | Cytoplasm            | 115965632           | 115967404 | 373                | 8.25 | 41.08       |
| Csodd-C21 | CSS0046316.1 | Chr 3      | 2      | Cytoplasm            | 13398596            | 13402483  | 351                | 5.46 | 40.08       |
| Csodd-C22 | CSS0030401.1 | Chr 9      | 2      | Cytoplasm            | 59599291            | 59603560  | 334                | 6.44 | 37.89       |
| Csodd-C23 | CSS0036541.1 | Chr 15     | 1      | Cytoplasm            | 25894721            | 25897043  | 361                | 7.18 | 40.32       |
| Csodd-C24 | CSS0009911.1 | Chr 14     | 3      | Cytoplasm            | 34381490            | 34384961  | 365                | 4.88 | 40.86       |
| Csodd-C25 | CSS0006465.1 | Chr 15     | 1      | Cytoplasm            | 25409475            | 25411622  | 361                | 7.18 | 40.23       |
| Csodd-C26 | CSS0011888.1 | Chr 10     | 2      | Cytoplasm            | 137637759           | 137643274 | 362                | 6.51 | 40.81       |
| Csodd-C27 | CSS0003382.1 | Chr 13     | 3      | Cytoplasm            | 80058876            | 80064037  | 341                | 6.44 | 38.93       |
| Csodd-C28 | CSS0030853.1 | Chr 3      | 3      | Cytoplasm            | 13355548            | 13358628  | 333                | 6.3  | 38.7        |
| Csodd-C29 | CSS0008117.1 | Chr 5      | 2      | Cytoplasm            | 133842097           | 133845493 | 377                | 6.8  | 42.59       |
| Csodd-C30 | CSS0019461.1 | Chr 1      | 2      | Cytoplasm            | 75597351            | 75599523  | 383                | 6.64 | 43          |
| Csodd-C31 | CSS0009584.1 | Chr 5      | 2      | Cytoplasm            | 137818203           | 137821604 | 377                | 6.72 | 42.71       |
| Csodd-C32 | CSS0007745.1 | Chr 9      | 2      | Cytoplasm            | 59548673            | 59560708  | 336                | 5.17 | 38.4        |
| Csodd-C33 | CSS0019623.1 | Chr 1      | 2      | Cytoplasm            | 159550132           | 159553332 | 378                | 7.36 | 43.04       |
| Csodd-C34 | CSS0008358.1 | Chr 8      | 2      | Cytoplasm            | 120988611           | 120996669 | 332                | 6.51 | 38.31       |
| Csodd-C35 | CSS0010021.1 | Chr 8      | 3      | Cytoplasm            | 70912531            | 70935552  | 361                | 5.06 | 41.22       |
| Csodd-C36 | CSS0006235.1 | Chr 13     | 3      | Cytoplasm            | 80362542            | 80367823  | 341                | 6.04 | 38.83       |
| Csodd-C37 | CSS0008107.1 | Chr 9      | 2      | Cytoplasm            | 145014231           | 145017595 | 373                | 6.34 | 42.23       |
| Csodd-C38 | CSS0009475.1 | Chr 9      | 2      | Cytoplasm            | 129899680           | 129903064 | 375                | 7.48 | 42.61       |

|           |              |            |   |           |           |           |     |      |       |
|-----------|--------------|------------|---|-----------|-----------|-----------|-----|------|-------|
| Csodd-C39 | CSS0035145.1 | Chr 1      | 3 | Cytoplasm | 18028988  | 18032759  | 367 | 6.35 | 41.65 |
| Csodd-C40 | CSS0030656.1 | Chr 9      | 2 | Cytoplasm | 137530916 | 137534428 | 374 | 6.23 | 42.31 |
| Csodd-C41 | CSS0001763.1 | Chr 1      | 3 | Cytoplasm | 125813218 | 125816934 | 342 | 5.83 | 38.61 |
| Csodd-C42 | CSS0037910.1 | Chr 4      | 1 | Cytoplasm | 157096232 | 157096786 | 341 | 6.95 | 38.9  |
| Csodd-C43 | CSS0044103.1 | Chr 7      | 2 | Cytoplasm | 15997144  | 16001372  | 333 | 6.17 | 37.91 |
| Csodd-C44 | CSS0007481.1 | Chr 4      | 2 | Cytoplasm | 185704870 | 185710799 | 359 | 6.51 | 40.45 |
| Csodd-C45 | CSS0017409.1 | Chr 4      | 2 | Cytoplasm | 57036013  | 57040804  | 376 | 7.42 | 43.02 |
| Csodd-C46 | CSS0045924.1 | Chr 4      | 2 | Cytoplasm | 67017586  | 67026144  | 339 | 5.11 | 38.82 |
| Csodd-C47 | CSS0011799.1 | Chr 14     | 2 | Cytoplasm | 93409064  | 93421650  | 323 | 9.55 | 36.56 |
| Csodd-C48 | CSS0009221.1 | Chr 7      | 2 | Cytoplasm | 143917051 | 143929702 | 374 | 6.94 | 41.84 |
| Csodd-C49 | CSS0031283.1 | Contig1189 | 2 | Cytoplasm | 1680      | 10870     | 363 | 6.37 | 40.82 |
| Csodd-C50 | CSS0019497.1 | Chr 1      | 2 | Cytoplasm | 40911835  | 40917704  | 363 | 6.51 | 40.8  |
| Csodd-C51 | CSS0042210.1 | Chr 10     | 3 | Cytoplasm | 99959571  | 99963481  | 390 | 6.38 | 44.45 |
| Csodd-C52 | CSS0044406.1 | Chr 11     | 3 | Cytoplasm | 88941199  | 88942964  | 340 | 4.71 | 38.84 |
| Csodd-C53 | CSS0039029.1 | Chr 14     | 2 | Cytoplasm | 94751537  | 94766725  | 323 | 9.25 | 36.5  |
| Csodd-C54 | CSS0036121.1 | Chr 4      | 2 | Cytoplasm | 159515000 | 159519413 | 366 | 6.07 | 41.34 |
| Csodd-C55 | CSS0019378.1 | Chr 9      | 2 | Cytoplasm | 22664785  | 22666758  | 378 | 6.05 | 42.42 |
| Csodd-C56 | CSS0028732.1 | Chr 13     | 3 | Cytoplasm | 79326831  | 79328302  | 341 | 6.67 | 38.08 |
| Csodd-C57 | CSS0016177.1 | Chr 9      | 2 | Cytoplasm | 149171408 | 149175923 | 368 | 5.56 | 41.47 |
| Csodd-C58 | CSS0032063.1 | Chr 5      | 2 | Cytoplasm | 18816392  | 18819594  | 328 | 5.99 | 37.44 |
| Csodd-C59 | CSS0039460.1 | Chr 8      | 2 | Cytoplasm | 17404712  | 17411024  | 335 | 5.16 | 38.54 |
| Csodd-C60 | CSS0008204.1 | Chr 8      | 2 | Cytoplasm | 158484243 | 158487327 | 358 | 5.92 | 39.83 |
| Csodd-C61 | CSS0042979.1 | Chr 11     | 3 | Cytoplasm | 88952540  | 88954934  | 333 | 5.23 | 36.97 |
| Csodd-C62 | CSS0006299.1 | Chr 12     | 1 | Cytoplasm | 30285858  | 30296451  | 358 | 5.62 | 40.14 |
| Csodd-C63 | CSS0019002.1 | Chr 1      | 2 | Cytoplasm | 172500388 | 172503877 | 356 | 5.01 | 39.93 |
| Csodd-C64 | CSS0022476.1 | Chr 7      | 3 | Cytoplasm | 43386826  | 43389680  | 320 | 5.29 | 36.21 |
| Csodd-C65 | CSS0007851.1 | Chr 15     | 2 | Cytoplasm | 88513452  | 88519310  | 323 | 5.1  | 36.38 |
| Csodd-C66 | CSS0018017.1 | Chr 5      | 2 | Cytoplasm | 162773981 | 162778835 | 378 | 6.32 | 42.38 |
| Csodd-C67 | CSS0031289.1 | Chr 8      | 3 | Cytoplasm | 7380071   | 7383157   | 318 | 4.97 | 36.27 |
| Csodd-C68 | CSS0028530.1 | Chr 13     | 3 | Cytoplasm | 79389481  | 79391158  | 345 | 5.78 | 38.59 |
| Csodd-C69 | CSS0000425.1 | Chr 4      | 2 | Cytoplasm | 60509082  | 60511600  | 312 | 5.09 | 35.53 |
| Csodd-C70 | CSS0027544.1 | Contig127  | 2 | Cytoplasm | 4061      | 6903      | 312 | 5.09 | 35.53 |
| Csodd-C71 | CSS0024933.1 | Chr 5      | 2 | Cytoplasm | 163228421 | 163231372 | 371 | 5.4  | 41.75 |
| Csodd-C72 | CSS0031656.1 | Chr 6      | 2 | Cytoplasm | 45315518  | 45318390  | 306 | 6.25 | 38.34 |
| Csodd-C73 | CSS0047624.1 | Chr 3      | 3 | Cytoplasm | 33235296  | 33238103  | 378 | 6.98 | 42.39 |
| Csodd-C74 | CSS0034471.1 | Contig1013 | 2 | Cytoplasm | 163868    | 166630    | 312 | 5.09 | 35.52 |
| Csodd-C75 | CSS0004426.1 | Chr9       | 3 | Cytoplasm | 89490805  | 89516404  | 270 | 6.96 | 30.49 |
| Csodd-C76 | CSS0020403.1 | Chr 5      | 2 | Cytoplasm | 37056687  | 37077502  | 300 | 6.28 | 33.84 |
| Csodd-C77 | CSS0003417.1 | Chr 13     | 3 | Cytoplasm | 79458653  | 79460167  | 336 | 5.21 | 37.66 |
| Csodd-C78 | CSS0000229.1 | Chr 1      | 2 | Cytoplasm | 153578284 | 153588879 | 310 | 5.22 | 35.26 |
| Csodd-C79 | CSS0024723.1 | Chr 13     | 4 | Cytoplasm | 79359028  | 79360383  | 330 | 5.57 | 37.02 |
| Csodd-C80 | CSS0041714.1 | Chr 8      | 1 | Cytoplasm | 71243130  | 71250682  | 165 | 5.01 | 18.65 |
| Csodd-C81 | CSS0048861.1 | Chr 7      | 2 | Cytoplasm | 62415661  | 62420865  | 314 | 4.56 | 35.76 |

|            |              |            |     |           |           |           |     |      |       |
|------------|--------------|------------|-----|-----------|-----------|-----------|-----|------|-------|
| Csodd-C82  | CSS0041600.1 | Chr 7      | 2   | Cytoplasm | 62560119  | 62563575  | 313 | 4.8  | 35.73 |
| Csodd-C83  | CSS0041090.1 | Chr 1      | 2   | Cytoplasm | 153203249 | 153213796 | 294 | 5.57 | 33.67 |
| Csodd-C84  | CSS0050328.1 | Chr 5      | 2   | Cytoplasm | 163425010 | 163427853 | 371 | 5.82 | 41.69 |
| Csodd-C85  | CSS0016518.1 | Chr 5      | 2   | Cytoplasm | 163315283 | 163321801 | 371 | 6.19 | 41.71 |
| Csodd-C86  | CSS0015129.1 | Chr 11     | 1   | Cytoplasm | 107597311 | 107606838 | 373 | 5.93 | 41.79 |
| Csodd-C87  | CSS0031730.1 | Chr 4      | 2   | Cytoplasm | 133498136 | 133502273 | 353 | 7.29 | 40.11 |
| Csodd-C88  | CSS0036790.1 | Chr 4      | 3   | Cytoplasm | 133445168 | 133452526 | 351 | 7.07 | 39.69 |
| Csodd-C89  | CSS0010687.1 | Chr 14     | 1   | Cytoplasm | 50370852  | 50372936  | 365 | 5.65 | 40.06 |
| Csodd-C90  | CSS0016175.1 | Chr 8      | 2   | Cytoplasm | 163002949 | 163003882 | 310 | 5.67 | 35.34 |
| Csodd-C91  | CSS0006729.1 | Chr 7      | 4   | Cytoplasm | 3656188   | 3665223   | 343 | 5.81 | 38.01 |
| Csodd-C92  | CSS0013094.1 | Chr 9      | 2   | Cytoplasm | 22720052  | 22722840  | 359 | 6.3  | 40.83 |
| Csodd-C93  | CSS0031308.1 | Chr 2      | 2   | Cytoplasm | 78165049  | 78186020  | 315 | 5.41 | 35.67 |
| Csodd-C94  | CSS0029211.1 | Chr 12     | 1   | Cytoplasm | 144150965 | 144154281 | 365 | 4.96 | 40    |
| Csodd-C95  | CSS0023813.1 | Contig1209 | 2   | Cytoplasm | 114716    | 117399    | 284 | 6.42 | 32.32 |
| Csodd-C96  | CSS0030231.1 | Chr 6      | 1   | Cytoplasm | 90284204  | 90286006  | 324 | 4.8  | 36.5  |
| Csodd-C97  | CSS0028241.1 | Chr 5      | 2   | Cytoplasm | 162729899 | 162733688 | 361 | 5.42 | 40.1  |
| Csodd-C98  | CSS0014098.1 | Chr 14     | 10  | Cytoplasm | 114704029 | 114710160 | 335 | 4.93 | 38.54 |
| Csodd-C99  | CSS0037766.1 | Chr 15     | 2   | Cytoplasm | 25930537  | 25934792  | 314 | 5.64 | 35.66 |
| Csodd-C100 | CSS0037970.1 | Chr 15     | 2   | Cytoplasm | 25435804  | 25440032  | 314 | 5.88 | 37.75 |
| Csodd-C101 | CSS0030295.1 | Chr 5      | 3   | Cytoplasm | 4262979   | 4265576   | 313 | 5.28 | 35.68 |
| Csodd-C102 | CSS0013741.1 | Chr 9      | 2   | Cytoplasm | 22356320  | 22358550  | 371 | 5.62 | 41.89 |
| Csodd-C103 | CSS0028792.1 | Chr 14     | 3   | Cytoplasm | 119061416 | 119065279 | 355 | 4.91 | 40.72 |
| Csodd-C104 | CSS0036983.1 | Chr 8      | 4   | Cytoplasm | 139595317 | 139600920 | 422 | 6.45 | 47.36 |
| Csodd-C105 | CSS0004829.1 | Chr 10     | 4   | Cytoplasm | 98799393  | 98818425  | 292 | 4.89 | 33.18 |
| Csodd-C106 | CSS0030637.1 | Chr 14     | 4   | Cytoplasm | 118976216 | 118980132 | 332 | 6.68 | 37.45 |
| Csodd-C107 | CSS0041639.1 | Contig914  | 2   | Cytoplasm | 101317    | 103524    | 329 | 6.18 | 37.24 |
| Csodd-C108 | CSS0002912.1 | Chr 14     | 10  | Cytoplasm | 84592522  | 84600531  | 337 | 5.28 | 38.74 |
| Csodd-C109 | CSS0007997.1 | Chr 1      | 1   | Cytoplasm | 89451272  | 89452562  | 317 | 6.98 | 35.82 |
| Csodd-C110 | CSS0046216.1 | Chr 12     | 1   | Cytoplasm | 144124181 | 144126467 | 352 | 5.25 | 39.95 |
| Csodd-C111 | CSS0011056.1 | Chr 14     | 10  | Cytoplasm | 114442156 | 114448906 | 352 | 5.25 | 39.95 |
| Csodd-C112 | CSS0001975.1 | Chr 5      | 2   | Cytoplasm | 35613720  | 35618688  | 305 | 5.59 | 33.94 |
| Csodd-C113 | CSS0002044.1 | Chr 11     | 2   | Cytoplasm | 71377198  | 71382622  | 352 | 7.11 | 39.38 |
| Csodd-C114 | CSS0031464.1 | Chr 3      | 6   | Cytoplasm | 167370321 | 167372227 | 313 | 5.4  | 35.83 |
| Csodd-C115 | CSS0014812.1 | Chr 9      | 2   | Cytoplasm | 2489121   | 22491543  | 360 | 6.39 | 40.67 |
| Csodd-C116 | CSS0002163.1 | Chr 5      | 4   | Cytoplasm | 65930498  | 65930587  | 321 | 4.92 | 36.67 |
| Csodd-C117 | CSS0008883.1 | Chr 5      | 3   | Cytoplasm | 65815053  | 65817295  | 321 | 4.92 | 36.67 |
| Csodd-C118 | CSS0030701.1 | Chr 8      | 9   | Cytoplasm | 113610172 | 113636645 | 269 | 4.91 | 31.14 |
| Csodd-C119 | CSS0032638.1 | Chr 9      | 3   | Cytoplasm | 22449932  | 22470696  | 354 | 6.38 | 39.79 |
| Csodd-C120 | CSS0009643.1 | Chr 3      | 2   | Cytoplasm | 146882043 | 146886536 | 314 | 6.32 | 35.98 |
| Csodd-C121 | CSS0029177.1 | Chr 1      | 377 | Cytoplasm | 22449932  | 22470696  | 311 | 6.23 | 34.56 |
| Csodd-C122 | CSS0034241.1 | Chr 15     | 7   | Cytoplasm | 25533479  | 25541336  | 313 | 6.24 | 35.89 |
| Csodd-C123 | CSS0047673.1 | Chr 10     | 9   | Cytoplasm | 60446947  | 60472665  | 337 | 5.04 | 38.67 |
| Csodd-C124 | CSS0039776.1 | Chr 15     | 2   | Cytoplasm | 26024338  | 26026745  | 313 | 6.38 | 35.88 |

|            |              |        |    |           |           |           |     |      |       |
|------------|--------------|--------|----|-----------|-----------|-----------|-----|------|-------|
| Csodd-C125 | CSS0039676.1 | Chr 1  | 2  | Cytoplasm | 166134112 | 166151509 | 316 | 6.84 | 35.45 |
| Csodd-C126 | CSS0045512.1 | Chr 13 | 10 | Cytoplasm | 113368518 | 113375229 | 325 | 5.02 | 37.21 |
| Csodd-C127 | CSS0012096.1 | Chr 3  | 2  | Cytoplasm | 147064910 | 147067631 | 313 | 5.6  | 35.82 |
| Csodd-C128 | CSS0016828.1 | Chr 3  | 2  | Cytoplasm | 26024338  | 26026745  | 313 | 5.6  | 35.82 |
| Csodd-C129 | CSS0033274.1 | Chr 13 | 2  | Cytoplasm | 79334288  | 79335199  | 162 | 8.5  | 17.53 |
| Csodd-C130 | CSS0037947.1 | Chr 15 | 2  | Cytoplasm | 25954387  | 25957010  | 314 | 4.18 | 35.61 |
| Csodd-C131 | CSS0005236.1 | Chr 15 | 4  | Cytoplasm | 25464771  | 25467644  | 314 | 6.18 | 35.61 |
| Csodd-C132 | CSS0008939.1 | Chr 2  | 3  | Cytoplasm | 107302939 | 107307995 | 368 | 4.93 | 41.59 |
| Csodd-C133 | CSS0026038.1 | Chr 9  | 3  | Cytoplasm | 100715634 | 100728952 | 359 | 6.29 | 40.5  |
| Csodd-C134 | CSS0014460.1 | Chr 14 | 11 | Cytoplasm | 42377575  | 42389572  | 325 | 4.97 | 36.54 |
| Csodd-C135 | CSS0048328.1 | Chr 14 | 11 | Cytoplasm | 114805455 | 114812183 | 331 | 5.14 | 37.9  |
| Csodd-C136 | CSS0038898.1 | Chr 14 | 10 | Cytoplasm | 84542666  | 84549087  | 345 | 6.35 | 39.85 |
| Csodd-C137 | CSS0039070.1 | Chr 15 | 2  | Cytoplasm | 25941753  | 25945083  | 311 | 5.21 | 35.47 |
| Csodd-C138 | CSS0049117.2 | Chr 10 | 10 | Cytoplasm | 60533863  | 60551483  | 360 | 6.85 | 40.73 |
| Csodd-C139 | CSS0001124.1 | Chr 15 | 2  | Cytoplasm | 25449844  | 25453050  | 311 | 5.56 | 35.49 |
| Csodd-C140 | CSS0029347.1 | Chr 1  | 3  | Cytoplasm | 166223004 | 166226595 | 293 | 6.17 | 32.3  |
| Csodd-C141 | CSS0045784.1 | Chr 8  | 4  | Cytoplasm | 139525743 | 139530954 | 371 | 5.85 | 41.27 |
| Csodd-C142 | CSS0004808.1 | Chr 14 | 4  | Cytoplasm | 115290494 | 115297154 | 331 | 4.93 | 37.71 |
| Csodd-C143 | CSS0027842.1 | Chr 2  | 9  | Cytoplasm | 33092154  | 33097821  | 273 | 5    | 30.28 |
| Csodd-C144 | CSS0044777.1 | Chr 15 | 2  | Cytoplasm | 25948042  | 25949857  | 314 | 5.12 | 36.12 |
| Csodd-C145 | CSS0001495.1 | Chr 14 | 11 | Cytoplasm | 42528175  | 42533095  | 282 | 5.17 | 31.52 |
| Csodd-C146 | CSS0013328.1 | Chr 14 | 10 | Cytoplasm | 42423451  | 42430641  | 313 | 6.24 | 35.72 |
| Csodd-C147 | CSS0049343.1 | Chr 9  | 3  | Cytoplasm | 101337744 | 101342352 | 343 | 6.58 | 38.61 |
| Csodd-C148 | CSS0020124.1 | Chr 15 | 3  | Cytoplasm | 25456082  | 25457775  | 297 | 4.9  | 34.2  |
| Csodd-C149 | CSS0009248.1 | Chr 5  | 2  | Cytoplasm | 163388666 | 163408780 | 190 | 5.06 | 20.67 |
| Csodd-C150 | CSS0031074.1 | Chr 9  | 4  | Cytoplasm | 63521954  | 63523856  | 278 | 4.82 | 31.82 |
| Csodd-C151 | CSS0018498.1 | Chr 3  | 4  | Cytoplasm | 25946119  | 25947865  | 298 | 7.29 | 33.29 |
| Csodd-C152 | CSS0028720.1 | Chr 2  | 2  | Cytoplasm | 107699160 | 107712158 | 308 | 4.34 | 34.24 |
| Csodd-C153 | CSS0024206.1 | Chr 6  | 3  | Cytoplasm | 112024767 | 112031124 | 278 | 4.64 | 31.45 |

---
