# Supplementary material for: Genome-Wide Identification of 2-Oxoglutarate and Fe (II)-Dependent Dioxygenase (2ODD-C) Family Genes and Expression Profiles under Different Abiotic Stresses in Camellia sinensis (L.)
Source: MDPI journal article supplement (doi:10.3390/plants12061302), 2023-03-14
Supplement: s1 [file s1]

**Table S10** The primer sequences used in this study

| Primer ID   | Sequence                 | Primer ID    | Sequence                |
|-------------|--------------------------|--------------|-------------------------|
| CsTBP-F     | GGCGGATCAAGTGTGGAAGGGAG  | CsODD-C72-F  | GCAGACAAGGGCCCCAGATTTG  |
| CsTBP-R     | ACGCTTGGGATTGTATTCGGCATT | CsODD-C72-R  | GAAGCCCCAGTCTGCACAAGCC  |
| CsODD-C8-F  | GTCGAATATCTCCTCCTAAC     | CsODD-C80-F  | TCAATGGAGTTGAGGGCTTC    |
| CsODD-C8-R  | TAACTCTAGAACCTCACAAG     | CsODD-C80-R  | TGCTCTAAGAATGACTTTCCGT  |
| CsODD-C27-F | GTAGCATCAGAGTTAATGAAGG   | CsODD-C95-F  | GCTGGTGGAAATCATTCTCTTGC |
| CsODD-C27-R | CCTTCTCATTGGTATAGGTTAG   | CsODD-C95-R  | ATAGCATTGAGCACAGAGCA    |
| CsODD-C35-F | TGTCCAATTCTCTCAGAAGATG   | CsODD-C107-F | TGCTCGGATAGCTCCTTTCTA   |
| CsODD-C35-R | CAGTTTCTCCACTAGTAAAGGG   | CsODD-C107-R | AGAGGTTGAGAGACTTGAGGAT  |
| CsODD-C36-F | CCAGAATCAGTTGATGAGTA     | CsODD-C109-F | CTCTCTACAACCTCCTGTAT    |
| CsODD-C36-R | CTTGGTTAAGAAGGGTAAGA     | CsODD-C109-R | CCATACTCTCTCAGTATCTC    |
| CsODD-C39-F | GGAGAGACTTCTTGAAGCTTAG   | CsODD-C121-F | GCTTTTCGTTTGAGGGATGGCC  |
| CsODD-C39-R | CCTTAAGTCAGAAGGAGAAGAA   | CsODD-C121-R | GAAAGGAACATACAAGCGTGAG  |
| CsODD-C44-F | CTTCTTCTACAATCCCAATG     |              |                         |
| CsODD-C44-R | CCTTGTCCTAATGAACAATC     |              |                         |
