# Supplementary material for: Genome-Wide Identification of 2-Oxoglutarate and Fe (II)-Dependent Dioxygenase (2ODD-C) Family Genes and Expression Profiles under Different Abiotic Stresses in Camellia sinensis (L.)
Source: MDPI journal article supplement (doi:10.3390/plants12061302), 2023-03-14
Supplement: s1 [file s1]

**Table S8** The same expression pattern of *CsODD-C* genes under MeJA, PEG and NaCl treatments

| Type   | Genes      | MeJA  |       |       | PEG    |        |        | NaCL   |        |        |
|--------|------------|-------|-------|-------|--------|--------|--------|--------|--------|--------|
|        |            | 0 h   | 24 h  | 48 h  | 0 h    | 24 h   | 48 h   | 0 h    | 24 h   | 48 h   |
| Type 3 | CsODD-C36  | 1.09  | 4.85  | 3.08  | 12.98  | 116.03 | 58.71  | 12.98  | 93.77  | 66.43  |
|        | CsODD-C21  | 85.39 | 56.09 | 65.27 | 418.27 | 163.19 | 100.93 | 418.27 | 110.97 | 180.80 |
| Type 4 | CsODD-C109 | 0.07  | 0.00  | 0.00  | 0.16   | 0.00   | 0.00   | 0.16   | 0.00   | 0.00   |

Note: type3, CsODD-C genes were only upregulated in 48 h after MeJA and PEG treatments;  
type4, CsODD-C genes were only downregulated in 48 h after MeJA and PEG treatments
