# Supplementary material for: Genome-Wide Identification of 2-Oxoglutarate and Fe (II)-Dependent Dioxygenase (2ODD-C) Family Genes and Expression Profiles under Different Abiotic Stresses in Camellia sinensis (L.)
Source: MDPI journal article supplement (doi:10.3390/plants12061302), 2023-03-14
Supplement: s1 [file s1]

**Table S5** The same expression pattern of *CsODD-C* genes under MeJA and PEG treatments

| Type   | Genes      | MeJA  |        |       | PEG   |        |       |
|--------|------------|-------|--------|-------|-------|--------|-------|
|        |            | 0 h   | 24 h   | 48 h  | 0 h   | 24 h   | 48 h  |
| Type 1 | CsODD-C125 | 0.26  | 2.73   | 4.27  | 0.38  | 3.65   | 2.92  |
|        | CsODD-C36  | 1.09  | 4.85   | 3.08  | 12.98 | 116.03 | 58.71 |
|        | CsODD-C8   | 1.20  | 3.26   | 2.90  | 0.66  | 4.62   | 5.12  |
|        | CsODD-C2   | 0.22  | 0.31   | 0.24  | 0.41  | 9.24   | 1.06  |
| Type 2 | CsODD-C4   | 0.00  | 0.03   | 0.00  | 0.00  | 0.20   | 0.08  |
|        | CsODD-C42  | 0.00  | 0.33   | 0.00  | 0.00  | 0.24   | 0.00  |
|        | CsODD-C46  | 72.74 | 161.36 | 63.83 | 1.27  | 2.38   | 0.63  |
|        | CsODD-C66  | 0.10  | 0.65   | 0.37  | 0.53  | 9.75   | 2.21  |
|        | CsODD-C107 | 0.00  | 0.04   | 0.00  | 0.00  | 1.17   | 0.23  |
| Type 3 | CsODD-C93  | 3.29  | 1.25   | 19.39 | 0.00  | 0.00   | 0.11  |

Note: Type1, the expression level of *CsODD-C* genes were increased after MeJA and PEG treatments; type2, the expression level of *CsODD-C* genes were increased from 0 h to 24h and then decreased from 24 h to 48 h after MeJA and PEG treatments; type3, *CsODD-C* genes were only upregulated in 48 h after MeJA and PEG treatments
