# Supplementary material for: Genome-Wide Identification of 2-Oxoglutarate and Fe (II)-Dependent Dioxygenase (2ODD-C) Family Genes and Expression Profiles under Different Abiotic Stresses in Camellia sinensis (L.)
Source: MDPI journal article supplement (doi:10.3390/plants12061302), 2023-03-14
Supplement: s1 [file s1]

**Table S3** One-to-one orthologous relationships between *C. sinensis* and *Arabidopsis*.

| Seq_1      | Gene_ID_1  | Seq_2     | Gene_ID_2 | Ka     | Ks     | Ka/Ks  |
|------------|------------|-----------|-----------|--------|--------|--------|
| CsODD-C2   | CSS0030708 | AtODD-C1  | AT1G02400 | 0.3161 | 4.1659 | 0.0759 |
| CsODD-C3   | CSS0021896 | AtODD-C22 | AT1G47990 | 0.3477 | 4.3139 | 0.0806 |
| CsODD-C5   | CSS0001566 | AtODD-C22 | AT1G47990 | 0.3931 | 5.1588 | 0.0762 |
| CsODD-C10  | CSS0032224 | AtODD-C62 | AT4G10490 | 0.3620 | 4.7569 | 0.0761 |
| CsODD-C13  | CSS0042033 | AtODD-C80 | AT5G24530 | 0.2271 | 2.8841 | 0.0787 |
| CsODD-C14  | CSS0007535 | AtODD-C50 | AT3G21420 | 0.2301 | 2.0095 | 0.1145 |
| CsODD-C20  | CSS0047148 | AtODD-C35 | AT1G80330 | 0.3899 | 3.0095 | 0.1040 |
| CsODD-C23  | CSS0036541 | AtODD-C35 | AT1G80330 | 0.4265 | 5.1259 | 0.0832 |
| CsODD-C25  | CSS0006465 | AtODD-C15 | AT1G15550 | 0.3285 | 5.6508 | 0.0581 |
| CsODD-C26  | CSS0011888 | AtODD-C43 | AT2G38240 | 0.3264 | 4.3478 | 0.0751 |
| CsODD-C28  | CSS0030853 | AtODD-C48 | AT3G19000 | 0.287  | 3.5291 | 0.0813 |
| CsODD-C30  | CSS0019461 | AtODD-C85 | AT5G51810 | 0.2657 | 3.3943 | 0.0783 |
| CsODD-C48  | CSS0009221 | AtODD-C43 | AT2G38240 | 0.3273 | 3.8175 | 0.0857 |
| CsODD-C50  | CSS0019497 | AtODD-C58 | AT3G55970 | 0.2753 | 2.7909 | 0.0986 |
| CsODD-C59  | CSS0039460 | AtODD-C66 | AT4G21200 | 0.2406 | 3.2357 | 0.0744 |
| CsODD-C67  | CSS0031289 | AtODD-C11 | AT1G12010 | 0.1876 | 1.6284 | 0.1152 |
| CsODD-C69  | CSS0000425 | AtODD-C31 | AT1G77330 | 0.1797 | 1.9480 | 0.0922 |
| CsODD-C72  | CSS0031656 | AtODD-C37 | AT2G19590 | 0.1808 | 2.0422 | 0.0885 |
| CsODD-C88  | CSS0036790 | AtODD-C53 | AT3G47190 | 0.4820 | 2.6213 | 0.1839 |
| CsODD-C91  | CSS0006729 | AtODD-C46 | AT3G12900 | 0.2967 | 2.243  | 0.1323 |
| CsODD-C99  | CSS0037766 | AtODD-C25 | AT1G52790 | 0.4454 | 1.9477 | 0.2287 |
| CsODD-C106 | CSS0030637 | AtODD-C78 | AT5G20400 | 0.4198 | 2.4746 | 0.1696 |
| CsODD-C109 | CSS0007997 | AtODD-C69 | AT4G23340 | 0.2478 | 2.8916 | 0.0857 |
| CsODD-C113 | CSS0002044 | AtODD-C87 | AT5G58660 | 0.4376 | 1.8694 | 0.2341 |
| CsODD-C117 | CSS0008883 | AtODD-C6  | AT1G05010 | 0.1630 | 2.4506 | 0.0665 |
| CsODD-C118 | CSS0030701 | AtODD-C30 | AT1G62380 | 0.2289 | 1.7153 | 0.1335 |
| CsODD-C137 | CSS0039070 | AtODD-C34 | AT1G80320 | 0.5797 | 4.1297 | 0.1404 |
| CsODD-C139 | CSS0001124 | AtODD-C34 | AT1G80320 | 0.5795 | 3.6352 | 0.1594 |
| CsODD-C148 | CSS0020124 | AtODD-C14 | AT1G15540 | 0.4914 | 2.6642 | 0.1844 |
| CsODD-C149 | CSS0009248 | AtODD-C82 | AT5G43450 | 0.4761 | 3.8274 | 0.1244 |
| CsODD-C150 | CSS0031074 | AtODD-C31 | AT1G77330 | 0.1923 | 2.9432 | 0.0653 |
| CsODD-C117 | CSS0008883 | AtODD-C11 | AT1G12010 | 0.1887 | 1.8324 | 0.1030 |
| CsODD-C67  | CSS0031289 | AtODD-C30 | AT1G62380 | 0.2068 | 2.0008 | 0.1034 |
| CsODD-C50  | CSS0019497 | AtODD-C45 | AT3G11180 | 0.2776 | 2.1027 | 0.1320 |
| CsODD-C50  | CSS0019497 | AtODD-C73 | AT5G05600 | 0.2288 | 1.1603 | 0.1972 |
| CsODD-C10  | CSS0032224 | AtODD-C80 | AT5G24530 | 0.2247 | 1.1573 | 0.1942 |
