# Supplementary material for: Genome-Wide Identification of 2-Oxoglutarate and Fe (II)-Dependent Dioxygenase (2ODD-C) Family Genes and Expression Profiles under Different Abiotic Stresses in Camellia sinensis (L.)
Source: MDPI journal article supplement (doi:10.3390/plants12061302), 2023-03-14
Supplement: s1 [file s1]

**Table S9** Protein interaction networks of CsODD-C proteins.

| ID_1       | Gene_1       | ID_2       | Gene_2       | Combined_score |
|------------|--------------|------------|--------------|----------------|
| CsODD-C32  | CSS0007745.1 | CsODD-C110 | CSS0046216.1 | 0.7            |
| CsODD-C32  | CSS0007745.1 | CsODD-C151 | CSS0018498.1 | 0.7            |
| CsODD-C46  | CSS0045924.1 | CsODD-C110 | CSS0046216.1 | 0.7            |
| CsODD-C46  | CSS0045924.1 | CsODD-C151 | CSS0018498.1 | 0.7            |
| CsODD-C60  | CSS0008204.1 | CsODD-C146 | CSS0013328.1 | 0.598          |
| CsODD-C145 | CSS0001495.1 | CsODD-C72  | CSS0031656.1 | 0.423          |
| CsODD-C145 | CSS0001495.1 | CsODD-C95  | CSS0023813.1 | 0.423          |
| CsODD-C149 | CSS0009248.1 | CsODD-C26  | CSS0011888.1 | 0.546          |
| CsODD-C149 | CSS0009248.1 | CsODD-C44  | CSS0007481.1 | 0.546          |
| CsODD-C149 | CSS0009248.1 | CsODD-C48  | CSS0009221.1 | 0.546          |
| CsODD-C149 | CSS0009248.1 | CsODD-C49  | CSS0031283.1 | 0.546          |
| CsODD-C149 | CSS0009248.1 | CsODD-C50  | CSS0019497.1 | 0.546          |
| CsODD-C34  | CSS0008358.1 | CsODD-C29  | CSS0008117.1 | 0.758          |
| CsODD-C34  | CSS0008358.1 | CsODD-C30  | CSS0019461.1 | 0.758          |
| CsODD-C34  | CSS0008358.1 | CsODD-C31  | CSS0009584.1 | 0.758          |
| CsODD-C34  | CSS0008358.1 | CsODD-C37  | CSS0008107.1 | 0.758          |
| CsODD-C34  | CSS0008358.1 | CsODD-C38  | CSS0009475.1 | 0.758          |
| CsODD-C34  | CSS0008358.1 | CsODD-C60  | CSS0008204.1 | 0.758          |
| CsODD-C59  | CSS0039460.1 | CsODD-C29  | CSS0008117.1 | 0.758          |
| CsODD-C59  | CSS0039460.1 | CsODD-C30  | CSS0019461.1 | 0.758          |
| CsODD-C59  | CSS0039460.1 | CsODD-C31  | CSS0009584.1 | 0.758          |
| CsODD-C59  | CSS0039460.1 | CsODD-C37  | CSS0008107.1 | 0.758          |
| CsODD-C59  | CSS0039460.1 | CsODD-C38  | CSS0009475.1 | 0.758          |
| CsODD-C59  | CSS0039460.1 | CsODD-C60  | CSS0008204.1 | 0.758          |
| CsODD-C145 | CSS0001495.1 | CsODD-C146 | CSS0013328.1 | 0.426          |
