# Supplementary material for: Genome-Wide Identification of 2-Oxoglutarate and Fe (II)-Dependent Dioxygenase (2ODD-C) Family Genes and Expression Profiles under Different Abiotic Stresses in Camellia sinensis (L.)
Source: MDPI journal article supplement (doi:10.3390/plants12061302), 2023-03-14
Supplement: s1 [file s1]

**Table S2** Segmentally duplicated *Cs2ODD-C* gene pairs.

| <b>Seq_1</b> | <b>Gene_ID_1</b> | <b>Seq_2</b> | <b>Gene_ID_2</b> | <b>Ka</b> | <b>Ks</b> | <b>Ka/Ks</b> |
|--------------|------------------|--------------|------------------|-----------|-----------|--------------|
| Csodd-C2     | CSS0030708       | Csodd-C3     | CSS0021896       | 0.2761    | 1.6756    | 0.1648       |
| Csodd-C3     | CSS0021896       | Csodd-C5     | CSS0001566       | 0.1313    | 0.5269    | 0.2493       |
| Csodd-C10    | CSS0032224       | Csodd-C13    | CSS0042033       | 0.065     | 0.7707    | 0.0843       |
| Csodd-C23    | CSS0036541       | Csodd-C20    | CSS0047148       | 0.1059    | 0.5861    | 0.1806       |
| Csodd-C25    | CSS0006465       | Csodd-C20    | CSS0047148       | 0.1059    | 0.5694    | 0.1859       |
| Csodd-C26    | CSS0011888       | Csodd-C44    | CSS0007481       | 0.1422    | 0.6297    | 0.2259       |
| Csodd-C28    | CSS0030853       | Csodd-C42    | CSS0037910       | 0.2150    | 1.2972    | 0.1658       |
| Csodd-C44    | CSS0007481       | Csodd-C48    | CSS0009221       | 0.2157    | 1.8854    | 0.1144       |
| Csodd-C46    | CSS0045924       | Csodd-C32    | CSS0007745       | 0.1075    | 0.7166    | 0.1500       |
| Csodd-C50    | CSS0019497       | Csodd-C26    | CSS0011888       | 0.2856    | 2.5541    | 0.1118       |
| Csodd-C52    | CSS0044406       | Csodd-C56    | CSS0028732       | 0.3132    | 1.2473    | 0.2511       |
| Csodd-C59    | CSS0039460       | Csodd-C34    | CSS0008358       | 0.1057    | 0.4429    | 0.2387       |
| Csodd-C64    | CSS0022476       | Csodd-C67    | CSS0031289       | 0.1211    | 0.9414    | 0.1286       |
| Csodd-C65    | CSS0007851       | Csodd-C93    | CSS0031308       | 0.2731    | 1.5087    | 0.1810       |
| Csodd-C105   | CSS0004829       | Csodd-C69    | CSS0000425       | 0.0117    | 0.0272    | 0.4298       |
| Csodd-C110   | CSS0046216       | Csodd-C89    | CSS0010687       | 0.0946    | 0.8659    | 0.1092       |
| Csodd-C113   | CSS0002044       | Csodd-C88    | CSS0036790       | 0.2073    | 0.7531    | 0.2753       |
| Csodd-C117   | CSS0008883       | Csodd-C64    | CSS0022476       | 0.0677    | 0.4952    | 0.1366       |
| Csodd-C5     | CSS0001566       | Csodd-C2     | CSS0030708       | 0.2637    | 1.3641    | 0.1933       |
| Csodd-C44    | CSS0007481       | Csodd-C50    | CSS0019497       | 0.2144    | 1.8284    | 0.1173       |
| Csodd-C48    | CSS0009221       | Csodd-C50    | CSS0019497       | 0.1341    | 1.1475    | 0.1168       |
| Csodd-C67    | CSS0031289       | Csodd-C117   | CSS0008883       | 0.1182    | 0.9171    | 0.1289       |
| Csodd-C102   | CSS0013741       | Csodd-C71    | CSS0024933       | 0.3129    | 1.4492    | 0.2159       |
