# Supplementary material for: Genome-Wide Identification of 2-Oxoglutarate and Fe (II)-Dependent Dioxygenase (2ODD-C) Family Genes and Expression Profiles under Different Abiotic Stresses in Camellia sinensis (L.)
Source: MDPI journal article supplement (doi:10.3390/plants12061302), 2023-03-14
Supplement: s1 [file s1]

**Table S4** One-to-one orthologous relationships between *C. sinensis* and rice.

| <b>Seq_1</b> | <b>Gene_ID_1</b> | <b>Seq_2</b> | <b>Gene_ID_2</b> | <b>Ka</b> | <b>Ks</b> | <b>Ka/Ks</b> |
|--------------|------------------|--------------|------------------|-----------|-----------|--------------|
| CsODD-C14    | CSS0007535       | OsODD-C12    | LOC_Os01g70930   | 0.3361    | 2.9067    | 0.1156       |
| CsODD-C23    | CSS0036541       | OsODD-C1     | LOC_Os01g08220   | 0.5519    | 2.7090    | 0.2037       |
| CsODD-C26    | CSS0011888       | OsODD-C18    | LOC_Os03g18030   | 0.3551    | 2.1526    | 0.1650       |
| CsODD-C44    | CSS0007481       | OsODD-C18    | LOC_Os03g18030   | 0.3414    | 4.8755    | 0.0700       |
| CsODD-C48    | CSS0009221       | OsODD-C18    | LOC_Os03g18030   | 0.3278    | 2.5327    | 0.1294       |
